# Supplementary material for: Neuron‐specific translational control shift ensures proteostatic resilience during ER stress
Source: PubMed Central journal article supplement — EMBO J. 2022 Jul 6;41(16):e110501. doi: 10.15252/embj.2021110501 (PMC9379547; doi:10.15252/embj.2021110501), 2022-07-06
Supplement: EMBJ-41-e110501-s011.pdf [file EMBJ-41-e110501-s011.pdf]

## Expanded View Figures

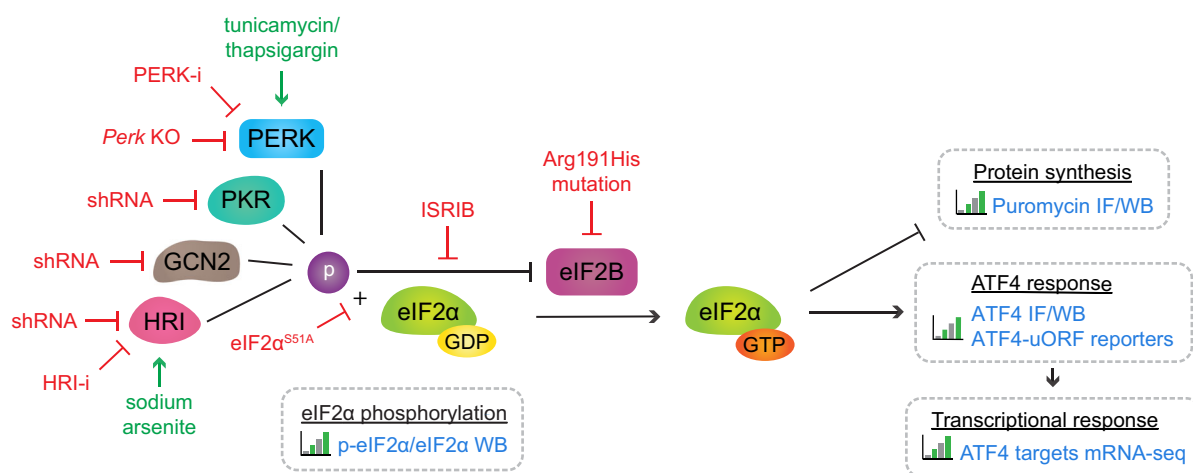

**Figure EV1. ISR interventions and experimental readouts used in this study.**

Schematic overview of the interventions inhibiting (red) and activating (green) the ISR and experimental readouts (blue text) used in this study. WB: Western blot; IF: Immunofluorescence.

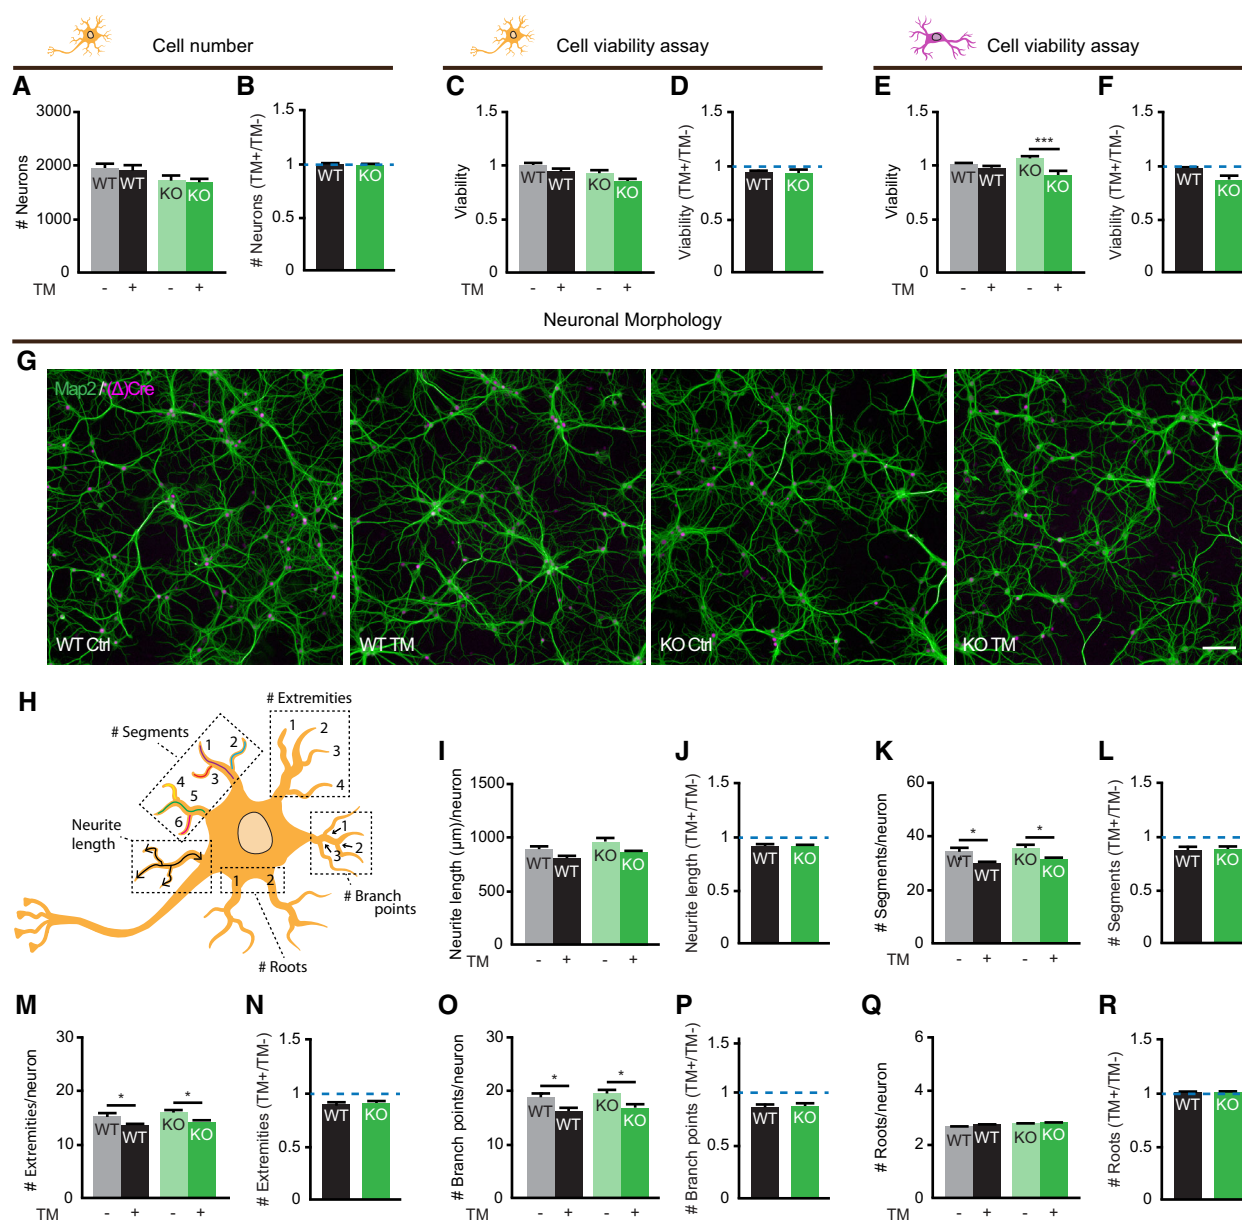

**Figure EV2. Neurons *in vitro* are tolerant to PERK dysfunction.**

A–F Viability of WT and *Perk* KO neurons (A–D) and astrocytes (E–F) ± 20–24 h of TM-induced ER stress. (A) Absolute cell number and (B) the change in cell number in response to ER stress ( $N = 7$ ). (C, E) Absolute metabolic activity and (D, F) the change in metabolic activity in response to ER stress, determined by the CellTiter-Glo Luminescent Cell Viability Assay (Promega) (E–D,  $N = 6$ ; E–F,  $N = 3$ ). Baseline level (without ER stress) is depicted by dashed line.

G–R Neuronal morphology of WT and *Perk* KO neurons ± 20–24 h of TM-induced ER stress ( $N = 7$ ). (G) Representative images obtained by high-content microscopy. Dendrites (MAP2, green), nuclei ((Δ)Cre, magenta). Scale bar: 100 μm. (H) Schematic representation of morphological measures. Absolute morphological measures ((I) neurite length, (K) # segments, (M) # extremities, (O) # branch points and (Q) # roots) and the change in neuronal morphology in response to ER stress (J, L, N, P, R). Baseline level (without ER stress) is depicted by dashed line.

Data information: Data are presented as mean ± SEM.  $N$ : Biological replicate. Relevant  $P$ -values are indicated: \* $P < 0.05$  and \*\*\* $P < 0.001$ . Statistical analysis: Two-way ANOVA with Tukey's *post-hoc* test (A, C, E, I, K, M, O, Q); nested  $t$ -test (B, D, F, J, L, N, P, R). Source data are available online for this figure.

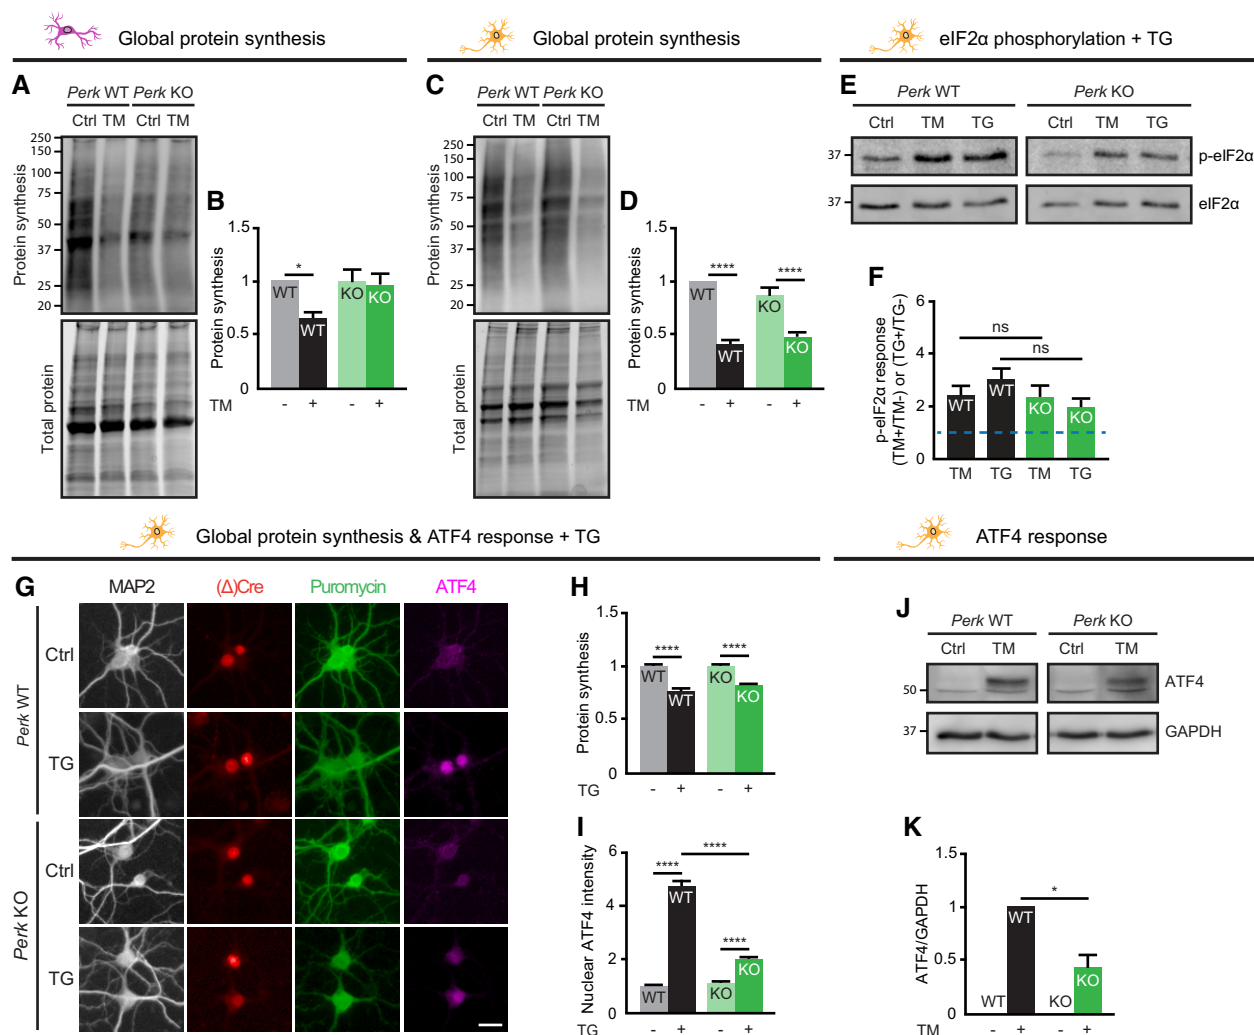

**Figure EV3. ER stress-induced reduction in protein synthesis is preserved in PERK-deficient neurons—Related to Figs 1 and 2.**

A–D Protein synthesis in WT and *Perk* KO astrocytes (A, B,  $N = 4$ ) and neurons (C, D,  $N = 7$ )  $\pm$  20–24 h of TM-induced ER stress. Representative WB (A, C) and quantification (B, D) of puromycinylated proteins as a measure for *de novo* protein synthesis. Data are normalised to untreated WT.

E–I eIF2 $\alpha$  phosphorylation ( $N = 4$ ), protein synthesis ( $N = 3$ ) and ATF4 expression ( $N = 3$ ) in WT and *Perk* KO astrocytes and neurons  $\pm$  20–24 h of TG-induced ER stress. Representative WB (E) and quantification (F) of the ER stress-induced p-eIF2 $\alpha$  response, relative to untreated cells of the same genotype. Baseline level (without ER stress) is depicted by dashed line. (E) All lanes are from the same gel/blot. (G) Representative images obtained by high-content microscopy showing puromycinylated proteins and ATF4 immunofluorescence. Dendrites (MAP2, white), nuclei (( $\Delta$ )Cre, red), *de novo*-synthesised proteins (puromycin, green) and ATF4 (magenta). Scale bar: 25  $\mu$ m. Quantification of (H) puromycin intensity as a measure for *de novo* protein synthesis and (I) absolute nuclear ATF4 intensity. Data are normalised to untreated WT.

J, K Representative WB (J) and quantification (K) of ATF4 expression in WT and *Perk* KO neurons  $\pm$  20–24 h of TM-induced ER stress ( $N = 4$ ). ATF4 level is corrected for GAPDH level. Data are normalised to TM-treated WT. (J) All lanes are from the same gel/blot.

Data information: Data are presented as mean  $\pm$  SEM.  $N$ : Biological replicate. Relevant  $P$ -values are indicated: \* $P < 0.05$ , \*\*\*\* $P < 0.0001$  and ns: not significant. Statistical analysis: two-way ANOVA with Tukey's *post-hoc* test (B D, F, H, I); one-sample *t*-test with a hypothetical value of 1 (K). Source data are available online for this figure.

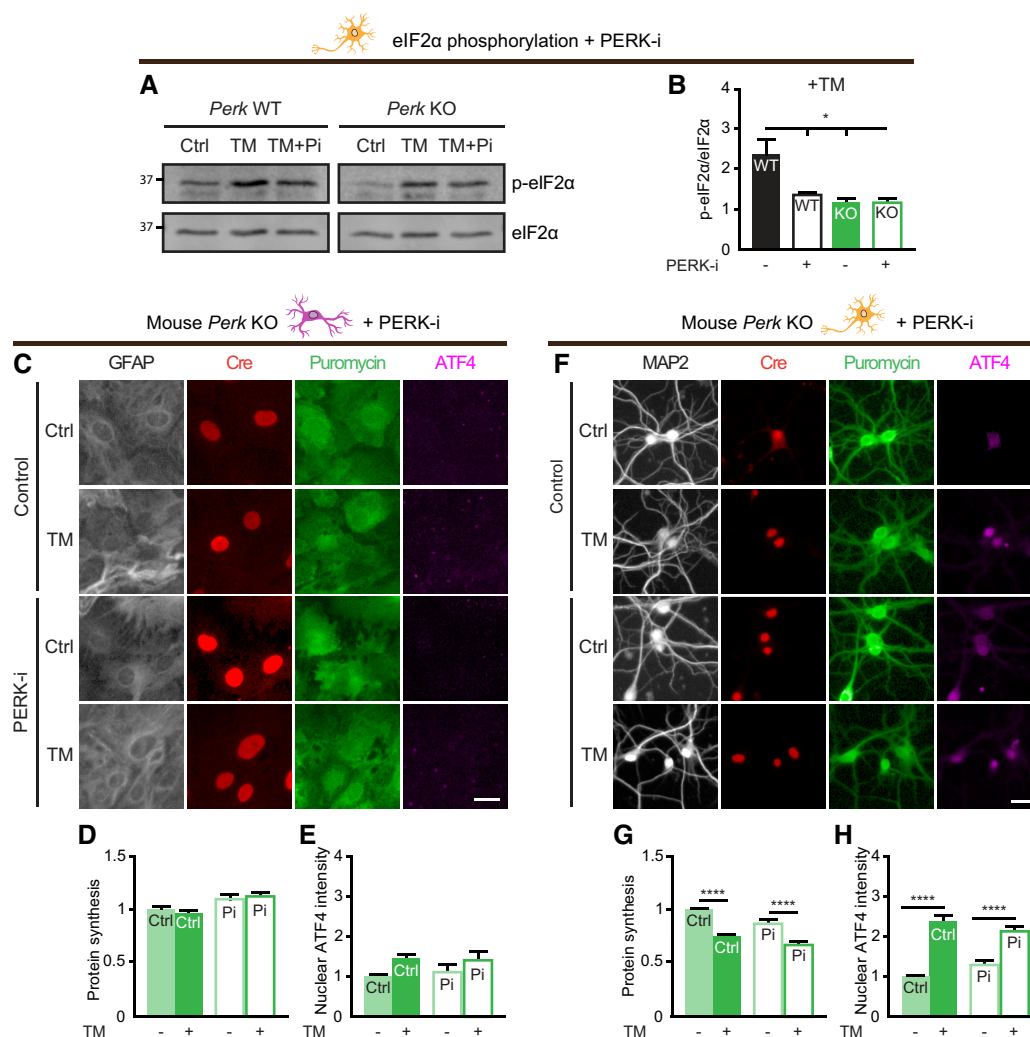

**Figure EV4. Preservation of ER stress-induced translational control in *Perk* KO neurons is not caused by low level residual PERK—Related to Fig 3.**

A, B eIF2α phosphorylation in WT and *Perk* KO astrocytes and neurons ±20–24 h of TM-induced ER stress in the presence or absence of PERK-i ( $N = 3$ ). Representative WB (A) and quantification (B) of phosphorylated eIF2α level (p-eIF2α/eIF2α). Data are normalised to untreated WT. (A) All lanes are from the same gel/blot.

C–H Protein synthesis and ATF4 expression in *Perk* KO astrocytes and neurons ±20–24 h of TM-induced ER stress in the presence of PERK-i. (C, F) Representative images obtained by high-content microscopy. Astrocytic soma (GFAP, white), dendrites (MAP2, white), nuclei (Cre, red), *de novo*-synthesised proteins (puromycin, green) and ATF4 (magenta). Scale bar: 25 μm. (D,  $N = 4$ ; G,  $N = 4$ ) Quantification of puromycin intensity as a measure for *de novo* protein synthesis. (E,  $N = 5$ ; H,  $N = 4$ ) Quantification of absolute nuclear ATF4 intensity. Data are normalised to untreated *Perk* KO cells. See for data WT cells Fig 3A and D (representative images are of the same experiment).

Data information: Data are presented as mean ± SEM.  $N$ : Biological replicate. Relevant  $P$ -values are indicated: \* $P < 0.05$ , \*\*\*\* $P < 0.0001$  and ns: not significant. Statistical analysis: two-way ANOVA with Tukey's *post-hoc* test. Source data are available online for this figure.

**Figure EV5. HRI mediates part of the ER stress-induced translational control in PERK-deficient neurons—Related to Fig 4.**

- A–C ATF4 expression in WT and *Perk* KO neurons  $\pm 20$ –24 h of TM-induced ER stress in the absence or presence of HRI-i ( $N = 3$ ). (A) Representative images obtained by high-content microscopy. Dendrites (MAP2, white/cyan), nuclei (( $\Delta$ )Cre, green/red), ATF4 (magenta). Scale bar: 25  $\mu$ m. (B) Quantification of the ER stress-induced ATF4 response. Data are normalised to WT without HRI-i. Baseline level (without ER stress) is depicted by dashed line. (C) Quantification showing the percentage change in the ATF4 response induced by HRI-i. Calculated from data in (B):  $[(\text{HRI-i}^+ - \text{HRI-i}^-) / \text{HRI-i}^-] * 100$ .
- D–I Validation of PKR and GCN2 KD. (D, G) mRNA expression of (D) *Eif2ak2* (PKR) in PKR KD neurons and (G) *Eif2ak4* (GCN2) in GCN2 KD neurons, determined by RT-qPCR ( $N = 3$ ). Data are normalised to WT transduced with a scrambled construct (represented by a dashed line). (E, H) Quantification of the increase in nuclear ATF4 intensity in WT neurons  $\pm$  PKR KD  $\pm$  6 h of BEPP treatment ( $N = 3$ ) or in WT neurons  $\pm$  PKR KD  $\pm$  6 h of Halofuginone (Halo) treatment ( $N = 4$ ). (F,  $N = 3$ ; I,  $N = 4$ ) The remaining ATF4 response (%) upon PKR KD and GCN2 KD, respectively. Related to ATF4 response of WT transduced with shRNA control (100%, represented by a dashed line). (F) Calculated from data in (E):  $[(\text{KD\_BEPP}^+ - \text{KD\_BEPP}^-) / \text{KD\_BEPP}^-] / [(\text{WT\_BEPP}^+ - \text{WT\_BEPP}^-) / \text{WT\_BEPP}^-] * 100$ . (I) Calculated from data in (H):  $[(\text{KD\_Halo}^+ - \text{KD\_Halo}^-) / \text{KD\_Halo}^-] / [(\text{WT\_Halo}^+ - \text{WT\_Halo}^-) / \text{WT\_Halo}^-] * 100$ .
- J–L Effects of PKR and GCN2 KD in WT and *Perk* KO neurons  $\pm 20$ –24 h of TM-induced ER stress. (J) Representative images of ATF4 immunofluorescence obtained by high-content microscopy and quantification of the ER stress-induced ATF4 response in PKR KD (K) and GCN2 KD (L) neurons ( $N = 5$ ). Dendrites (MAP2, white/cyan), nuclei (( $\Delta$ )Cre, green/red) and ATF4 (magenta). Scale bar: 25  $\mu$ m. Data are related to untreated (scrambled) cells of the same genotype. Baseline level (without ER stress) is depicted by a dashed line.

Data information: Data are presented as mean  $\pm$  SEM.  $N$ : Biological replicate. Relevant  $P$ -values are indicated: \* $P < 0.05$ , \*\* $P < 0.01$ , \*\*\* $P < 0.001$ , \*\*\*\* $P < 0.0001$  and ns: not significant. Statistical analysis: Two-way ANOVA with Tukey's *post-hoc* test (B, E, H, K, L); nested  $t$ -test (C); and one-sample  $t$ -test with a hypothetical value of 100 (D, F, G, I).

Source data are available online for this figure.

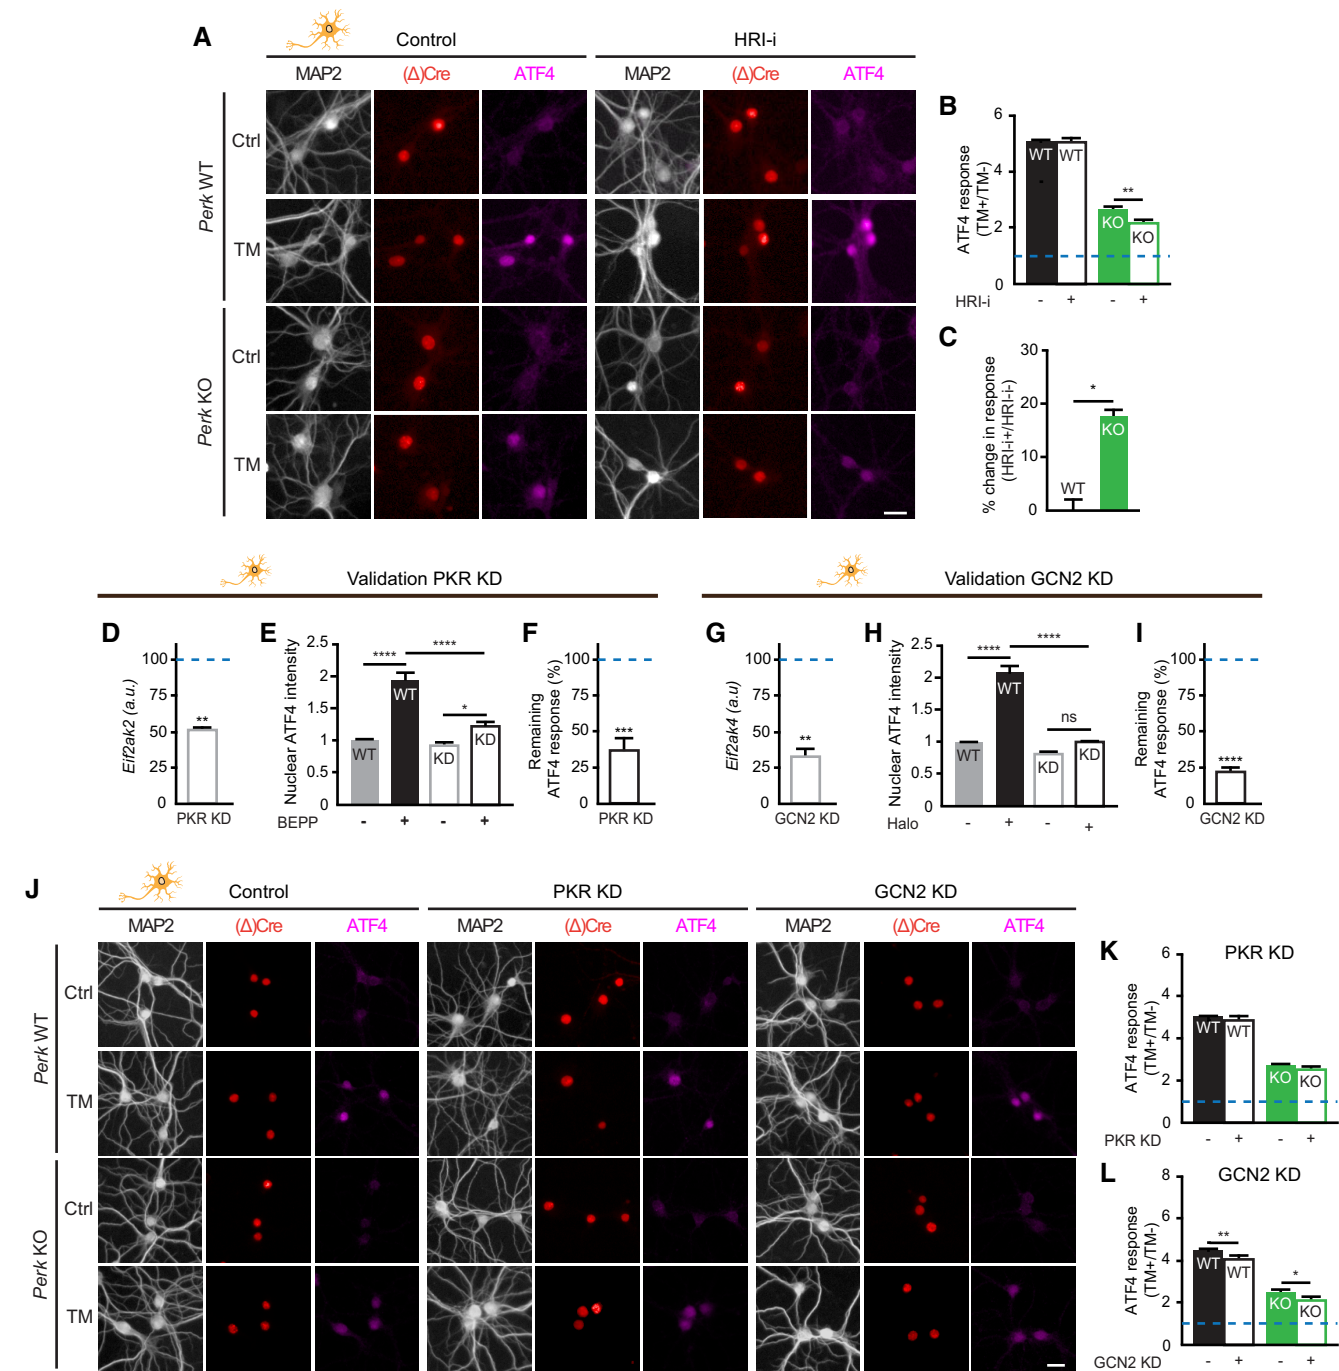

Figure EV5.
